# Supplementary material for: Carboxylic silane-exchanged manganese ferrite nanoclusters with high relaxivity for magnetic resonance imaging
Source: Royal Society of Chemistry journal article supplement (doi:10.1039/c3tb00037k), 2013-01-01
Supplement: c3tb00037k.pdf [file c3tb00037k.pdf]

# Carboxylic Silane-exchanged Manganese Ferrite Nanoclusters with High Relaxivity for Magnetic Resonance Imaging

Yingzhe Qi,<sup>a</sup> Chen Shao,<sup>a</sup> Wei Gu,<sup>a</sup> Fuying Li,<sup>a</sup> Yunlong Deng,<sup>a</sup> Hansheng Li<sup>\*b</sup> and Ling Ye<sup>\*a</sup>

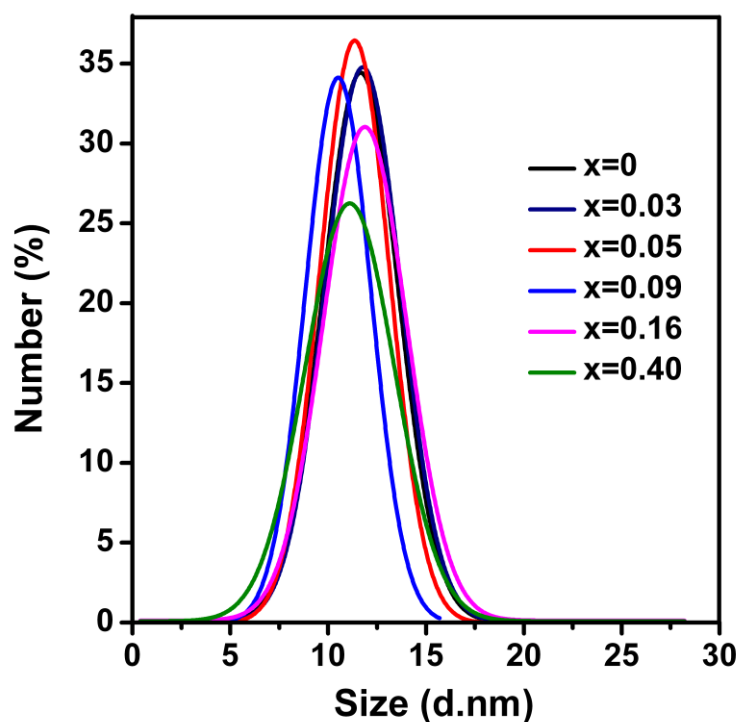

Fig. s1 Size distribution of OA-Mn<sub>x</sub>Fe<sub>(1-x)</sub>Fe<sub>2</sub>O<sub>4</sub> NPs in hexane.

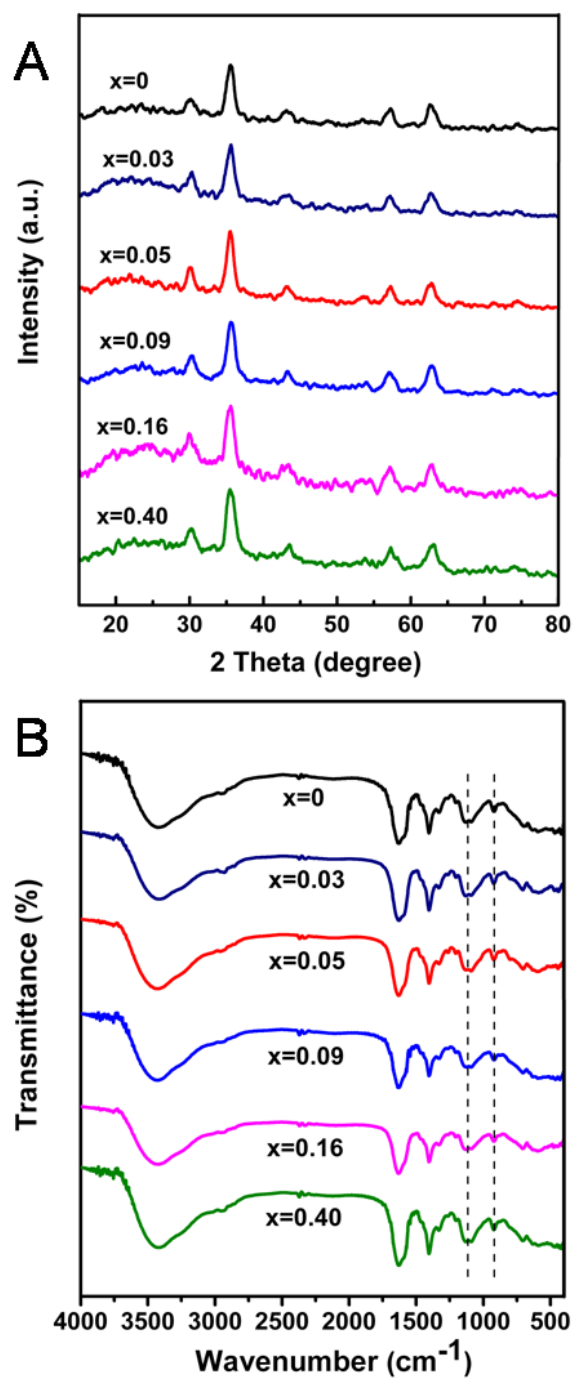

Fig. s2 XRD patterns (A) and FTIR spectra (B) of TETT-Mn<sub>x</sub>Fe<sub>(1-x)</sub>Fe<sub>2</sub>O<sub>4</sub> nanoclusters.

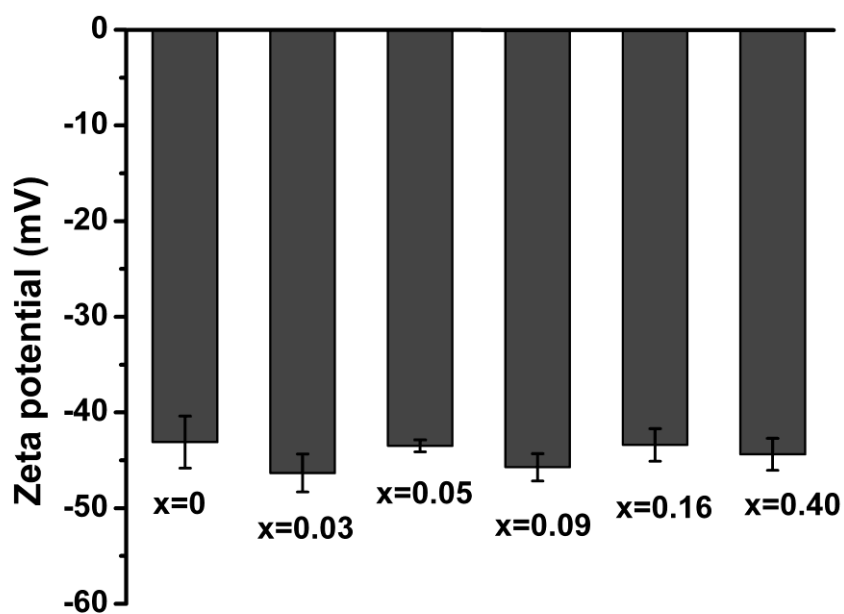

Fig. s3 zeta potential of TETT-Mn<sub>x</sub>Fe<sub>(1-x)</sub>Fe<sub>2</sub>O<sub>4</sub> nanoclusters in PBS (pH 7.4) at the concentration of 0.5 mg mL<sup>-1</sup>.

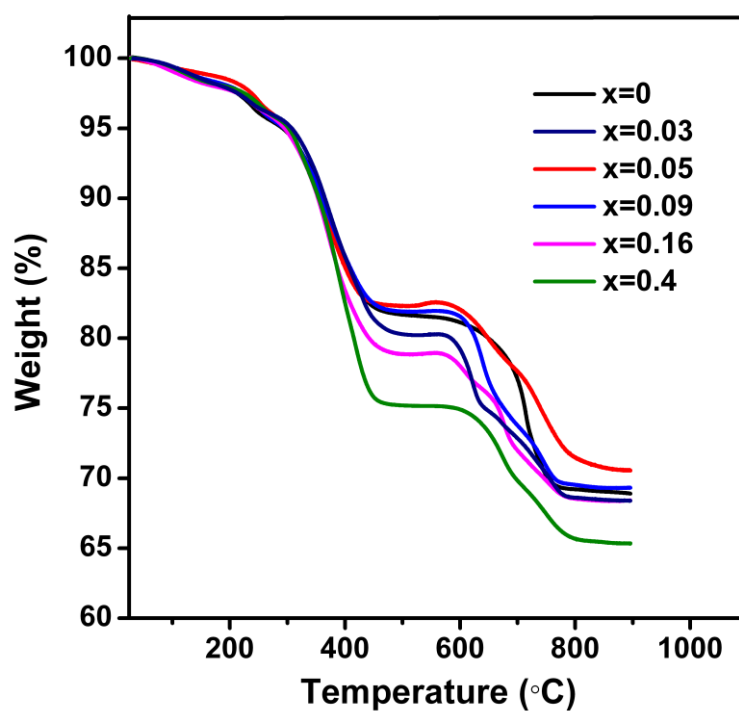

Fig. s4 Thermogravimetric analysis (TGA) curves for of OA-Mn<sub>x</sub>Fe<sub>(1-x)</sub>Fe<sub>2</sub>O<sub>4</sub> NPs.
